# Supplementary material
Source: Springer Nature journal article supplement (https://www.springermedizin.de/resource/supplementary/12936_2012_2178_MOESM2_ESM.pdf/9542954)
Supplement: MOESM2 [file 9542954]

Positive Blood test in  
2009-2011 N= 9111

*P. falciparum*  
N=1709

*P. Vivax*  
N=7317

Others  
•Gametocyte alone N=43  
•Mixed N=31  
•*P. malariae* N=11

Receive MAS3 treatment  
N= 1174 (69%)

Complete FU till  
day 42 N=578

42-day cure rate

Complete FU till  
day 28 N=619

28-day cure rate

At least one FU  
N=967

28-day/42-day  
cure rate

Complete day 3  
FU N=651

Delayed parasite  
clearance at day 3
